# Supplementary material for: Development and psychometric evaluation of a new domain‐specific coparenting measure: Coparenting Children's Emotion Scale
Source: PubMed Central journal article supplement (PMC11659102; doi:10.1111/famp.13031), 2024-08-21
Supplement: FAMP-63-2581-s001.pdf [file FAMP-63-2581-s001.pdf]

**Table S1***Items Developed for the Coparenting Children's Emotion Scale*

| <b>CCES item</b>                                                                                                                                 | <b>Original items</b>                                                                                                                                                                                            |
|--------------------------------------------------------------------------------------------------------------------------------------------------|------------------------------------------------------------------------------------------------------------------------------------------------------------------------------------------------------------------|
| 1. The other parent/caregiver asks my opinion about how we can best respond to our child's emotions.                                             | 3. My partner asks my opinion on issues related to parenting <sup>a</sup>                                                                                                                                        |
| 2. It is easier to talk to my child about his/her feelings when the other parent is not present.                                                 | 8. It is easier and more fun to play with the child alone than it is when my partner is present too <sup>a</sup>                                                                                                 |
| 3. I believe the other parent is good at responding to our child's emotions.                                                                     | 1. I believe my partner is a good parent <sup>a</sup>                                                                                                                                                            |
| 4. The other parent and I have the same goals for our child's emotional wellbeing.                                                               | 6. My partner and I have the same goals for our child <sup>a</sup>                                                                                                                                               |
| 5. The other parent likes to spend time with our child when the child is happy but expects me to respond to our child when he/she is sad. (R)    | 5. My partner likes to play with our child and then leave dirty work to me <sup>a</sup> (R)                                                                                                                      |
| 6. The other parent tells me I am doing a good job of helping our child with his/her emotions.                                                   | 10. My partner tells me I am doing a good job or otherwise lets me know I am being a good parent <sup>a</sup>                                                                                                    |
| 7. The other parent criticises the way I help our child with his/her emotions.                                                                   | 12. My partner sometimes makes jokes or sarcastic comments about the way I am as a parent <sup>a</sup>                                                                                                           |
| 8. The other parent pays a great deal of attention to our child's emotion.                                                                       | 4. My partner pays a great deal of attention to our child <sup>a</sup>                                                                                                                                           |
| 9. The other parent and I have different ideas about how to respond to our child's sadness.                                                      | 9. My partner and I have different ideas about how to raise our child <sup>a</sup> (R) and 11. My partner and I have different ideas regarding our child's eating, sleeping, and other routines <sup>a</sup> (R) |
| 10. The other parent likes to spend time with our child when the child is happy but expects me to respond to our child when he/she is angry. (R) | 5. My partner likes to play with our child and then leave dirty work to me <sup>a</sup> (R)                                                                                                                      |
| 11. The other parent/caregiver and I have arguments about how to respond to our child's emotions, when the child is not present                  | Created by CA                                                                                                                                                                                                    |
| 12. We often discuss the best way to meet our child's emotional needs.                                                                           | 19. We often discuss the best way to meet our child's needs <sup>a</sup>                                                                                                                                         |

| CCES item                                                                                                                       | Original items                                                                                                                                                                                                   |
|---------------------------------------------------------------------------------------------------------------------------------|------------------------------------------------------------------------------------------------------------------------------------------------------------------------------------------------------------------|
| 13. The other parent does not trust my ability to help our child when they are experiencing intense emotions.                   | 13. My partner does not trust my abilities as a parent <sup>a</sup>                                                                                                                                              |
| 14. The other parent still wants to do his/her own thing instead of being available when our child needs emotional support. (R) | 7. My partner still wants to do his or her own thing instead of being a responsible parent <sup>a</sup> (R)                                                                                                      |
| 15. The other parent does not like to be bothered by our child's sadness.                                                       | 29. My partner doesn't like to be bothered by our child <sup>a</sup> (R)                                                                                                                                         |
| 16. The other parent and I have different ideas about how to respond to our child's anger.                                      | 9. My partner and I have different ideas about how to raise our child <sup>a</sup> (R) and 11. My partner and I have different ideas regarding our child's eating, sleeping, and other routines <sup>a</sup> (R) |
| 17. The other parent appreciates how hard I work to support our child's emotional wellbeing.                                    | 25. My partner appreciates how hard I work at being a good parent <sup>a</sup>                                                                                                                                   |
| 18. The other parent tries to show that he/she is better than me at responding to our child's emotions.                         | 16. My partner tries to show that she or he is better than me at caring for our child <sup>a</sup>                                                                                                               |
| 19. The other parent is sensitive to our child's feelings.                                                                      | 14. My partner is sensitive to our child's feelings and needs <sup>a</sup>                                                                                                                                       |
| 20. The other parent does not talk to our child about emotions as often as I think he/she should. (R)                           | 20. My partner does not carry his or her fair share of the parenting work <sup>a</sup> (R)                                                                                                                       |
| 21. The other parent and I have different standards for how our child should behave when they are worried. (R)                  | 15. My partner and I have different standards for our child's behaviour <sup>a</sup> (R)                                                                                                                         |
| 22. The other parent uses strategies that I have asked him/her not to use when responding to our child's emotions               | 11. My partner uses parenting techniques that I have asked him/her not to use <sup>b</sup>                                                                                                                       |
| 23. When I'm overwhelmed by my child's emotions, the other parent provides me with the extra support I need.                    | 26. When I'm at my wits end as a parent, partner gives me extra support I need <sup>a</sup>                                                                                                                      |
| 24. The other parent has a lot of patience when responding to our child's emotions.                                             | 18. My partner has a lot of patience with our child <sup>a</sup>                                                                                                                                                 |

| CCES item                                                                                                    | Original items                                                                                                                                                                                                   |
|--------------------------------------------------------------------------------------------------------------|------------------------------------------------------------------------------------------------------------------------------------------------------------------------------------------------------------------|
| 25. The other partner and I have different ideas about how to respond to our child's worry.                  | 9. My partner and I have different ideas about how to raise our child <sup>a</sup> (R) and 11. My partner and I have different ideas regarding our child's eating, sleeping, and other routines <sup>a</sup> (R) |
| 26. In general, I think we work well together to support our child's emotional wellbeing.                    | 12. In general, I feel we work well together with our child <sup>b</sup>                                                                                                                                         |
| 27. The other parent does not like to be bothered by our child's anger.                                      | 29. My partner doesn't like to be bothered by our child <sup>a</sup> (R)                                                                                                                                         |
| 28. The other parent and I have different ideas about how to respond to our child's happiness.               | 9. My partner and I have different ideas about how to raise our child <sup>a</sup> (R) and 11. My partner and I have different ideas regarding our child's eating, sleeping, and other routines <sup>a</sup> (R) |
| 29. The other parent and I have different ideas about how to respond to our child's emotion.                 | 9. My partner and I have different ideas about how to raise our child <sup>a</sup> (R) and 11. My partner and I have different ideas regarding our child's eating, sleeping, and other routines <sup>a</sup> (R) |
| 30. The other parent makes me feel like I am providing our child with the best emotional support possible.   | 27. My partner makes me feel like I'm the best possible parent for our child <sup>a</sup>                                                                                                                        |
| 31. The other parent is willing to make personal sacrifices to prioritise our child's emotions.              | 23. My partner is willing to make personal sacrifices to help take care of our child <sup>a</sup>                                                                                                                |
| 32. The other parent and I have different standards for how our child should behave when they are sad. (R)   | 15. My partner and I have different standards for our child's behaviour <sup>a</sup> (R)                                                                                                                         |
| 33. The other parent ignores me when I ask his/her to help me respond to our child's emotions                | 4. When I ask for my partner's help when trying to get our child to bed, he/she ignores me <sup>b</sup>                                                                                                          |
| 34. The other parent does not like to be bothered by our child's worry.                                      | 29. My partner doesn't like to be bothered by our child <sup>a</sup> (R)                                                                                                                                         |
| 35. The other parent and I have different standards for how our child should behave when they are angry. (R) | 15. My partner and I have different standards for our child's behaviour <sup>a</sup> (R)                                                                                                                         |
| 36. The other parent and I have arguments about the best way to respond to our child's emotions. (R)         | Created by CA                                                                                                                                                                                                    |

| CCES item                                                                                                                                                      | Original items                                                                                                                                           |
|----------------------------------------------------------------------------------------------------------------------------------------------------------------|----------------------------------------------------------------------------------------------------------------------------------------------------------|
| 37. The other parent/caregiver does not like to be bothered by our child's strong/intense emotions.                                                            | 29. My partner doesn't like to be bothered by our child <sup>a</sup> (R)                                                                                 |
| 38. The other parent supports me when I am responding to our child's emotions.                                                                                 | Created by CA.                                                                                                                                           |
| 39. The other parent and I use similar strategies when helping our child with his/her emotions                                                                 | 7. My partner and I use similar parenting techniques <sup>a</sup>                                                                                        |
| 40. The other parent and I calmly discuss how we both want to help our child manage his/her emotions.                                                          | Created by CA                                                                                                                                            |
| 41. The other parent likes to spend time with our child when the child is happy but expects me to respond to our child when he/she is worried. (R)             | 5. My partner likes to play with our child and then leave dirty work to me <sup>a</sup> (R)                                                              |
| 42. The other parent and I have arguments about how to respond to our child's emotions, when the child is present.                                             | How often in a typical week, when all 3 of you are together, do you: 32. Argue with your partner about your child, in the child's presence? <sup>a</sup> |
| 43. The other parent disregards my feelings in front of our child.                                                                                             | Created by CA                                                                                                                                            |
| 44. The other parent supports me in front of our child, even though he/she may not agree with how I am responding to our child's emotions (R)                  | 14. When my partner doesn't agree with how I am handling our child, he/ she still backs me up in front of our child <sup>b</sup>                         |
| 45. The other parent criticises how I manage our child's emotions, when our child is present.                                                                  | 5. My partner criticizes my parenting in front of our child <sup>b</sup>                                                                                 |
| 46. I make negative comments to my child about how the other parent responds to his/her emotions (e.g., I think Dad can be very nasty to you when you're sad). | Created by CA                                                                                                                                            |

*Notes.*

<sup>a</sup>Items from Feinberg et al. (2012)

<sup>b</sup>Items adapted from Stright and Bales (2003)
