# Supplementary material for: Development and psychometric evaluation of a new domain‐specific coparenting measure: Coparenting Children's Emotion Scale
Source: PubMed Central journal article supplement (PMC11659102; doi:10.1111/famp.13031), 2024-08-21
Supplement: FAMP-63-2581-s002.pdf [file FAMP-63-2581-s002.pdf]

**Table S2***Finalised Items and Subscale Structure of the Coparenting Children's Emotion Scale*

---

| <b>Subscales</b>           | <b>Items</b>                                                                                                                                                                                                                                                                                                                                                                                                                                                                                                                                                                                                                                                                                                                                                                                                |
|----------------------------|-------------------------------------------------------------------------------------------------------------------------------------------------------------------------------------------------------------------------------------------------------------------------------------------------------------------------------------------------------------------------------------------------------------------------------------------------------------------------------------------------------------------------------------------------------------------------------------------------------------------------------------------------------------------------------------------------------------------------------------------------------------------------------------------------------------|
| <b>Support/cooperation</b> | <p>The other parent/caregiver is sensitive to our child's feelings.</p> <p>I believe the other parent/caregiver is good at responding to our child's emotions.</p> <p>The other parent/caregiver and I use similar strategies when helping our child with his/her emotions</p> <p>The other parent/caregiver does not like to be bothered by our child's intense emotions (R)</p> <p>We often discuss the best way to meet our child's emotional needs.</p> <p>When I'm overwhelmed by my child's emotions, the other parent/caregiver provides me with the extra support I need.</p> <p>The other parent/caregiver asks my opinion about how we can best respond to our child's emotions.</p> <p>The other parent/caregiver tells me I am doing a good job of helping our child with his/her emotions.</p> |
| <b>Undermining</b>         | <p>The other parent/caregiver criticises the way I help our child with his/her emotions.</p> <p>The other parent/caregiver tries to show that he/she is better than me at responding to our child's emotions.</p> <p>The other parent/caregiver does not trust my ability to help our child when they are experiencing intense emotions.</p>                                                                                                                                                                                                                                                                                                                                                                                                                                                                |

---
